# Supplementary material for: Whole-genome duplication and molecular evolution in Cornus L. (Cornaceae) – Insights from transcriptome sequences
Source: PLoS One. 2017 Feb 22;12(2):e0171361. doi: 10.1371/journal.pone.0171361 (PMC5321274; doi:10.1371/journal.pone.0171361)
Supplement: S2 Table — (XLSX) [file pone.0171361.s006.xlsx]

## Sheet: Table S2
Table S2. The BIC value of each number of groups (NG) for each species of Cornus
NG\Species	C. alternifolia	C. capitata	C. canadensis	C. controversa	C. ellipica	C. florida	C. kousa	C. officinallis
2	-841.39	-985.56	48.35	-496.56	-2359.25	-698.2	-2497.33	-2311.59
3	-1229.47	-1796.05	34.61	-1012.55	-2841.08	-974.38	-2835.31	-2860.42
4	-1633.76	-2246.68	37.88	-1451.62	-3139.18	-1198.26	-3174.29	-3221.45
5	-1709.25	-2522.04	39.58	-1600.57	-3564.43	-1477.17	-3484.52	-3525.86
