# Supplementary material for: Whole-genome duplication and molecular evolution in Cornus L. (Cornaceae) – Insights from transcriptome sequences
Source: PLoS One. 2017 Feb 22;12(2):e0171361. doi: 10.1371/journal.pone.0171361 (PMC5321274; doi:10.1371/journal.pone.0171361)
Supplement: S3 Table — (XLSX) [file pone.0171361.s007.xlsx]

## Sheet: Table S3
Table S3. Detailed information for each normal distribution groups for eight Cornus species and combined data
Species	Mean of Ks	Covariance of Ks	Mean of date (myr)	Variance of date (myr)	Number of paralogous	Percent of paralogous
CAL	0.010668	1.29704e-05	1.99803	0.680963	318	0.119146
	0.043445	0.00106234	8.1369	6.16281	834	0.312477
	0.36404	0.0238307	68.1818	29.1887	1118	0.418883
	0.80121	0.0143697	150.06	22.6658	267	0.100037
	1.0086	0.000886839	188.903	5.63079	132	0.0494567
CCA	0.011722	1.96644e-05	2.08231	0.794813	451	0.119155
	0.04417	0.000377099	7.84642	3.48059	752	0.198679
	0.12427	0.00256193	22.0755	9.07211	877	0.231704
	0.37262	0.0226044	66.1927	26.9477	1259	0.332629
	0.89424	0.0166947	158.854	23.1587	446	0.117834
CCN	0.55752	0.00167901	84.6333	6.27342	118	0.666667
	0.98698	0.0595551	149.827	37.3626	39	0.2203
	1.2328	0.00145604	187.143	5.84204	20	0.112994
CCO	0.0075631	3.67652e-06	1.4127	0.361619	199	0.0745598
	0.021274	6.38234e-05	3.97373	1.50668	314	0.117647
	0.079969	0.00138178	14.9373	7.01055	699	0.261896
	0.37679	0.020602	70.3799	27.0699	1005	0.376546
	0.85006	0.0177931	158.781	25.157	452	0.169352
CEL	0.0095665	9.03753e-06	1.71137	0.542702	392	0.098542
	0.043829	0.000440493	7.84063	3.78884	1146	0.288084
	0.12819	0.0027664	22.9321	9.49497	840	0.211161
	0.4256	0.022083	76.1362	26.8266	1282	0.322272
	0.91214	0.0117956	163.174	19.6063	318	0.0799397
CFL	0.0069236	1.59458e-06	1.23518	0.227286	156	0.065272
	0.036856	0.000369459	6.57515	3.45966	555	0.232218
	0.1237	0.00294625	22.0682	9.76977	549	0.229707
	0.41159	0.0223982	73.4281	26.9374	851	0.356067
	0.90058	0.0140282	160.664	21.3182	279	0.116736
CKO	0.0096778	1.18787e-05	1.73333	0.623002	415	0.121665
	0.039315	0.000314004	7.04148	3.20312	820	0.240399
	0.10723	0.00197114	19.2053	8.02534	857	0.251246
	0.39881	0.0203694	71.4285	25.7985	922	0.270302
	0.87664	0.0181661	157.01	24.3633	397	0.116388
COF	0.0098691	1.29981e-05	1.8021	0.664357	425	0.127704
	0.03571	0.000235147	6.52064	2.82573	613	0.184195
	0.10871	0.00217065	19.8504	8.58531	852	0.25601
	0.37506	0.0190062	68.4859	25.4044	1086	0.326322
	0.87202	0.0162781	159.231	23.5106	352	0.105769
Combine	-	-	2.39	0.664357	2445	0.109118
	-	-	7.05	2.82573	4713	0.210336
	-	-	21.7	7.32	5122	0.228589
	-	-	74.22	23.03	7452	0.332575
	-	-	162.79	20.89	2675	0.119382
Dates	-	-	84.34	0.96	9	0.0918367
	-	-	76.1	2.7	89	0.908163
Groups with more than 20% of total number of paralog pairs were highlighted in red and represented in Figures 2, 4-a and 4-c.
